# Supplementary material for: Suppressor mutations in ribosomal proteins and FliY restore Bacillus subtilis swarming motility in the absence of EF-P
Source: PLoS Genet. 2019 Jun 25;15(6):e1008179. doi: 10.1371/journal.pgen.1008179 (PMC6613710; doi:10.1371/journal.pgen.1008179)
Supplement: S1 Table — List of the accession numbers of FliY homologs used to generate Fig 1C. (XLSX) [file pgen.1008179.s008.xlsx]

## Sheet: TableS1_FliYHomologs
Organism	FliY Homolog Accession(s)
Syntrophomonas wolfei subsp. wolfei str. Goettingen G311	WP_011640285.1
Selenomonas ruminantium subsp. lactilytica TAM6421	WP_014423700.1
Enterococcus gallinarum	WP_008376584.1
Bacillus amyloliquefaciens TA208	WP_013352267.1
Bacillus anthracis str. Ames	NP_844108.1
Brevibacillus brevis NBRC 100599	WP_015891746.1
Bacillus cereus ATCC 14579	NP_831407.1
Bacillus coagulans 36D1	WP_017551523.1
Bacillus licheniformis DSM 13 = ATCC 14580	WP_003181794.1
Bacillus megaterium DSM 319	WP_013084785.1
Paenibacillus polymyxa E681	WP_013309899.1
Bacillus pumilus SAFR-032	WP_012009965.1
Bacillus sp.	WP_003231962.1
Bacillus cellulosilyticus DSM 2522	WP_013489081.1
Lysinibacillus sphaericus	WP_012293272.1
Geobacillus stearothermophilus 10	WP_053413696.1
Bacillus subtilis subsp. subtilis str. 168	NP_389514.1
Parageobacillus thermoglucosidasius C56-YS93	WP_013877207.1
[Bacillus thuringiensis] serovar konkukian str. 97-27	YP_035851.1
Amphibacillus xylanus NBRC 15112	WP_015010221.1
Bacillus atrophaeus 1942	WP_013390515.1
Geobacillus kaustophilus HTA426	WP_011230731.1
Paenibacillus larvae subsp. larvae DSM 25430	WP_042119024.1
Brevibacillus laterosporus LMG 15441	WP_003336920.1
Bacillus methanolicus MGA3	WP_034669573.1
Sporosarcina psychrophila	WP_067214012.1
Bacillus simplex	WP_061462416.1
Bacillus smithii	WP_048623169.1
Virgibacillus halodenitrificans	WP_071649064.1
Clostridium acetobutylicum ATCC 824	NP_348832.1
Clostridium botulinum A str. ATCC 19397	WP_011987032.1
Clostridium butyricum	WP_058141739.1
Clostridium cellulovorans 743B	WP_010077346.1
Clostridium formicaceticum	WP_070970516.1
Clostridium pasteurianum BC1	WP_015616092.1
Clostridium sporogenes	WP_033060740.1
[Clostridium] stercorarium subsp. stercorarium DSM 8532	WP_015358289.1
Acetoanaerobium sticklandii	WP_013361939.1
Clostridium tetani E88	WP_035125056.1
Ruminiclostridium thermocellum ATCC 27405	WP_011837840.1
Thermoanaerobacterium thermosaccharolyticum DSM 571	WP_013297924.1
Clostridium tyrobutyricum	WP_017895217.1
Clostridium beijerinckii NCIMB 8052	WP_038457943.1
[Clostridium] cellulolyticum H10	WP_015925486.1
Moorella thermoacetica ATCC 39073	YP_429666.1
Clostridium kluyveri NBRC 12016	WP_012102462.1
Clostridium ljungdahlii DSM 13528	WP_013237613.1
Clostridium novyi NT	WP_039224143.1
Clostridium scatologenes	WP_029162534.1
[Clostridium] acidurici 9a	WP_014967733.1
Desulfosporosinus orientis DSM 765	WP_014187089.1
Desulfotomaculum ruminis DSM 2154	WP_013841311.1
Desulfotomaculum nigrificans CO-1-SRB	WP_013810361.1
Halobacillus halophilus DSM 2266	WP_014643284.1
Sporosarcina ureae	WP_029053198.1
Lactobacillus ruminis ATCC 27782	WP_014073971.1
Listeria ivanovii subsp. ivanovii PAM 55	WP_014092145.1
Listeria monocytogenes serotype 4b str. F2365	WP_003740486.1
Listeria seeligeri serovar 1/2b str. SLCC3954	WP_012985060.1
Listeria innocua Clip11262	WP_003770895.1
Listeria welshimeri serovar 6b str. SLCC5334	WP_011701506.1
Peptoclostridium acidaminophilum DSM 3953	WP_025435635.1
Halanaerobium praevalens DSM 2228	WP_014552745.1
Thermotoga neapolitana DSM 4359	WP_015920318.1
Thermosipho africanus TCF52B	WP_012580318.1
Fervidobacterium nodosum Rt17-B1	WP_011994679.1
Lysinibacillus fusiformis	WP_008180757.1
Acetohalobium arabaticum DSM 5501	WP_013278581.1
[Clostridium] propionicum DSM 1682	WP_066053121.1
Thermoanaerobacter brockii subsp. finnii Ako-1	WP_012269367.1
Thermoanaerobacterium xylanolyticum LX-11	WP_013788094.1
Clostridium argentinense	WP_039632465.1
[Clostridium] cellulosi	WP_045085215.1
Clostridium lentocellum DSM 5427	WP_013657445.1
Caldicellulosiruptor bescii DSM 6725	WP_015908500.1
Halothermothrix orenii H 168	WP_015923394.1
Anoxybacillus flavithermus WK1	WP_012575298.1
Geobacillus thermodenitrificans NG80-2	WP_041264336.1
Geobacillus thermoleovorans CCB_US3_UF5	WP_025039351.1
Kyrpidia tusciae DSM 2912	WP_083780086.1
Acetobacterium woodii DSM 1030	WP_014356870.1
Heliobacterium modesticaldum Ice1	WP_012283291.1
Clostridium saccharoperbutylacetonicum N1-4(HMT)	WP_017810403.1
Desulfitobacterium dehalogenans ATCC 51507	WP_014795273.1
Enterococcus casseliflavus EC20	WP_005226637.1
[Eubacterium] eligens ATCC 27750	WP_012739067.1
[Eubacterium rectale] ATCC 33656	WP_012742636.1
Halobacteroides halobius DSM 5150	WP_015326366.1
Ammonifex degensii KC4	WP_015739971.1
Butyrivibrio proteoclasticus B316	WP_013280766.1
Caldicellulosiruptor saccharolyticus DSM 8903	WP_011916808.1
Paenibacillus durus	WP_042207134.1
Thermoanaerobacter wiegelii Rt8.B1	WP_014062904.1
Thermosipho melanesiensis BI429	WP_041426237.1
Clostridium chauvoei JF4335	WP_079481221.1
Candidatus Arthromitus sp. SFB-mouse-Japan	WP_007440009.1
Desulfitobacterium hafniense Y51	WP_011460753.1
Syntrophobotulus glycolicus DSM 8271	WP_013623837.1
Caldicellulosiruptor kristjanssonii I77R1B	WP_013431816.1
Caldicellulosiruptor lactoaceticus 6A	WP_014043061.1
Caldicellulosiruptor owensensis OL	WP_013412703.1
Dehalobacter restrictus DSM 9455	WP_019226139.1
Desulfotomaculum acetoxidans DSM 771	WP_015759156.1,WP_083773356.1
Desulfotomaculum reducens MI-1	WP_011877448.1,WP_011878688.1
Paenibacillus peoriae	WP_053325261.1
Paenibacillus mucilaginosus KNP414	WP_013919483.1
Lachnoclostridium phytofermentans ISDg	WP_012200715.1
Petrotoga mobilis SJ95	WP_012207970.1
Selenomonas sputigena ATCC 35185	WP_013740935.1
Solibacillus silvestris StLB046	WP_014824481.1
Desulfosporosinus meridiei DSM 13257	WP_014904653.1
Bacillus clausii KSM-K16	WP_011247100.1
Bacillus gibsonii	WP_014479788.1
Bacillus pseudofirmus OF4	WP_012959378.1
Clostridium aceticum	WP_044825936.1
Clostridium autoethanogenum DSM 10061	WP_013237613.1
[Clostridium] saccharolyticum WM1	WP_013274046.1
[Bacillus] selenitireducens MLS10	WP_013172686.1
Thermacetogenium phaeum DSM 12270	WP_015050198.1
Syntrophothermus lipocalidus DSM 12680	WP_013175147.1
Bacillus weihenstephanensis KBAB4	WP_002012064.1
Bacillus flexus	WP_078989364.1
Bacillus halodurans C-125	WP_010898598.1
Lactobacillus acidipiscis	WP_010498218.1
Fervidobacterium pennivorans DSM 9078	WP_014450670.1
Thermotoga petrophila RKU-1	WP_011942923.1
Thermotoga naphthophila RKU-10	WP_012896009.1
Bacillus sp. OxB-1	WP_052484189.1
Desulfotomaculum gibsoniae DSM 7213	WP_006522061.1
Thermoanaerobacter italicus Ab9	WP_012995279.1
Thermotoga sp. RQ7	WP_015920318.1
Thermotoga sp. RQ2	WP_012310413.1
Geobacillus subterraneus	WP_063166287.1
Carboxydothermus hydrogenoformans Z-2901	WP_011343943.1
Exiguobacterium antarcticum B7	WP_041256133.1
Bacillus endophyticus	WP_046217796.1
Desulfitobacterium metallireducens DSM 15288	WP_006716710.1
Carnobacterium inhibens subsp. gilichinskyi	WP_023179052.1
Marinitoga piezophila KA3	WP_014297362.1
Bacillus toyonensis BCT-7112	WP_001115037.1
Paenibacillus terrae HPL-003	WP_014281089.1
Paenibacillus borealis	WP_039295184.1
Paenibacillus naphthalenovorans	WP_062407970.1
Clostridium saccharobutylicum DSM 13864	WP_041716372.1
Paenibacillus stellifer	WP_038696721.1
Oceanobacillus iheyensis HTE831	WP_041544130.1
Thermodesulfobium narugense DSM 14796	WP_013757134.1
Butyrivibrio hungatei	WP_071176150.1
Paenibacillus graminis	WP_042266961.1
Paenibacillus odorifer	WP_036688526.1
Anoxybacillus gonensis	WP_019418424.1
Bacillus krulwichiae	WP_066150198.1
Alkaliphilus metalliredigens QYMF	WP_012063835.1
Carnobacterium sp. 17-4	WP_013711610.1
Clostridium carboxidivorans P7	WP_007059602.1
Desulfitobacterium dichloroeliminans LMG P-21439	WP_015263239.1
Clostridium estertheticum subsp. estertheticum	WP_071613476.1
Rummeliibacillus stabekisii	WP_066785626.1
Mahella australiensis 50-1 BON	WP_013780495.1
Ethanoligenens harbinense YUAN-3	WP_013486402.1
Fictibacillus arsenicus	WP_066289437.1
Bacillus muralis	WP_064461867.1
[Clostridium] clariflavum DSM 19732	WP_014255136.1
Thermosediminibacter oceani DSM 16646	WP_013275911.1
Flavonifractor plautii	WP_065534028.1
Anoxybacillus amylolyticus	WP_066323827.1
Bacillus lehensis G1	WP_038480723.1
Roseburia hominis A2-183	WP_014079556.1
Paenibacillus sp. JDR-2	WP_015845018.1
Bacillus infantis NRRL B-14911	WP_009795891.1
Exiguobacterium sibiricum 255-15	WP_012370737.1
Oscillibacter valericigenes Sjm18-20	WP_014119745.1
Exiguobacterium sp. AT1b	WP_015881399.1
Pelosinus fermentans JBW45	WP_007953615.1
Paenibacillus sabinae T27	WP_025335362.1
Natranaerobius thermophilus JW/NM-WN-LF	WP_041366979.1
Thermobacillus composti KWC4	WP_015254959.1
Clostridium taeniosporum	WP_069679054.1
Thermoanaerobacter sp. X514	WP_003866714.1
Virgibacillus sp. SK37	WP_040955660.1
Alicyclobacillus acidocaldarius subsp. acidocaldarius DSM 446	WP_012810753.1
Caldicellulosiruptor hydrothermalis 108	WP_013402544.1
Caldicellulosiruptor kronotskyensis 2002	WP_013429531.1
Alkaliphilus oremlandii OhILAs	WP_012159349.1
Geobacillus sp. WCH70	WP_015863456.1
Paenibacillus sp. Y412MC10	WP_015736322.1
Paenibacillus riograndensis SBR5	WP_020434114.1
Pelosinus sp. UFO1	WP_038671344.1
Bacillus velezensis FZB42	WP_012117555.1
Thermoanaerobacter pseudethanolicus ATCC 33223	WP_012269367.1
Tepidanaerobacter acetatoxydans Re1	WP_013778303.1
Paenibacillus xylanexedens	WP_036609358.1
Geobacillus sp. Y412MC61	WP_013523403.1
Geobacillus sp. Y412MC52	WP_013523403.1
Bacillus safensis	WP_024424166.1
Thermoanaerobacter sp. X513	WP_003866714.1
Bacillus cytotoxicus NVH 391-98	WP_012093836.1
Geobacillus sp. Y4.1MC1	WP_013401258.1
Thermoanaerobacter mathranii subsp. mathranii str. A3	WP_013150338.1
Terribacillus aidingensis	WP_038560212.1
Bacillus beveridgei	WP_069365187.1
Vagococcus penaei	WP_077276676.1
Bacillus bombysepticus str. Wang	WP_044584274.1
Bacillus oceanisediminis 2691	WP_009330748.1
Bacillus sp. 1NLA3E	WP_015595441.1
Geobacillus sp. C56-T3	WP_013145751.1
Jeotgalibaca dankookensis	WP_062467811.1
Selenomonas sp. oral taxon 478	WP_050341513.1
Selenomonas sp. oral taxon 136	WP_061946191.1
Caldicellulosiruptor obsidiansis OB47	WP_013291203.1
Clostridium sp. BNL1100	WP_014313935.1
Bacillus sp. WP8	WP_039178540.1
Thermincola potens JR	WP_013120397.1
Desulfosporosinus acidiphilus SJ4	WP_014828687.1
Caldanaerobacter subterraneus subsp. tengcongensis MB4	WP_011025704.1
Defluviitoga tunisiensis	WP_045087060.1
Candidatus Arthromitus sp. SFB-rat-Yit	WP_014094499.1
Paenibacillus beijingensis	WP_045672002.1
Bacillus sp. JS	WP_014663977.1
Dehalobacter sp. CF	WP_015043590.1
Lysinibacillus varians	WP_024362024.1
Dehalobacter sp. DCA	WP_015043590.1
Thermotoga sp. 2812B	WP_008192642.1
Paenibacillus swuensis	WP_068608350.1
Bacillus xiamenensis	WP_008354482.1
Clostridium bornimense	WP_044037975.1
Fictibacillus phosphorivorans	WP_066393681.1
Exiguobacterium sp. ZWU0009	WP_047393813.1
Salimicrobium jeotgali	WP_008587874.1
Geobacillus sp. GHH01	WP_015374412.1
Exiguobacterium sp. MH3	WP_023468709.1
Geosporobacter ferrireducens	WP_069973823.1
Bacillus sp. Pc3	WP_039251507.1
Aneurinibacillus sp. XH2	WP_057898416.1
Thermosipho sp. 1063	WP_075666741.1
Paenibacillus yonginensis	WP_068694616.1
Anoxybacillus sp. B2M1	WP_044746133.1
Anoxybacillus sp. B7M1	WP_044746133.1
Jeotgalibacillus malaysiensis	WP_039808901.1
Candidatus Arthromitus sp. SFB-mouse-NL	WP_007440009.1
Paenibacillus sp. FSL P4-0081	WP_042138148.1
Paenibacillus sp. FSL R5-0345	WP_042128916.1
Paenibacillus sp. FSL R5-0912	WP_042237137.1
Paenibacillus sp. FSL R7-0273	WP_039874262.1
Paenibacillus sp. FSL R7-0331	WP_042177522.1
Paenibacillus sp. FSL H7-0357	WP_038593497.1
Paenibacillus sp. FSL H7-0737	WP_042189443.1
Marinitoga sp. 1137	WP_075780749.1
Bacillus weihaiensis	WP_072580041.1
Limnochorda pilosa	WP_068139652.1
Carnobacterium sp. CP1	WP_058919315.1
Bacillus sp. X1(2014)	WP_038534938.1
Paenibacillus sp. IHBB 10380	WP_044877584.1
Bacillus sp. BH072	WP_014417774.1
Bacillus sp. YP1	WP_014479788.1
Paenibacillus bovis	WP_060534454.1
Bacillus sp. LM 4-2	WP_003231962.1
Bacillus paralicheniformis ATCC 9945a	WP_020451401.1
Bacillus glycinifermentans	WP_046128952.1
Paenibacillus sp. 32O-W	WP_062492573.1
Kurthia sp. 11kri321	WP_068457493.1
Paenibacillus sp. LPB0068	WP_068655727.1
Bacillus sp. SDLI1	WP_060962788.1
Bacillus sp. IHB B 7164	WP_035438748.1
Desulfotomaculum ferrireducens	WP_077714843.1
Lachnoclostridium sp. YL32	WP_065551122.1
Ruminiclostridium sp. KB18	WP_066539709.1
Bacillus sp. FJAT-14266	WP_014479788.1
Bacillus sp. FDAARGOS_235	WP_001115037.1
Exiguobacterium sp. U13-1	WP_029342064.1
Bacillus sp. H15-1	WP_003181794.1
Selenomonas sp. oral taxon 920	WP_069181064.1
Bacillus sp. ABP14	WP_070805659.1
Jeotgalibaca sp. PTS2502	WP_076767829.1
Marinilactibacillus sp. 15R	WP_072695035.1
Virgibacillus sp. 6R	WP_050352748.1
Geobacillus genomosp. 3	WP_020959356.1
Sporosarcina sp. P37	WP_085431827.1
Sporosarcina sp. P33	WP_081244880.1
Bacillus sp. 275	WP_060675467.1
