# Supplementary material for: Suppressor mutations in ribosomal proteins and FliY restore Bacillus subtilis swarming motility in the absence of EF-P
Source: PLoS Genet. 2019 Jun 25;15(6):e1008179. doi: 10.1371/journal.pgen.1008179 (PMC6613710; doi:10.1371/journal.pgen.1008179)
Supplement: S9 Table — (DOCX) [file pgen.1008179.s016.docx]

| **Plasmid** | |  | **Genotype** | **Reference** |
| --- | --- | --- | --- | --- |
|  | pKRH9 | | *Ω∆fliMY mls amp* |  |
|  | pKRH20 | | *ΩyeeIsoe2,5,10,19,21,28 mls amp* |  |
|  | pKRH24 | | *amyE::Physpank-yeeI spec amp* |  |
|  | pKRH25 | | *amyE::Physpank-yeeIT19K spec amp* |  |
|  | pKRH28 | | *ΩyeeIsoe29 mls amp* |  |
|  | pKRH91 | | *amyE::Pfla/che-fliY-lacZ spec* |  |
|  | pKRH94 | | *amyE::Pfla/che-fliYS164A-lacZ spec* |  |
|  | pKRH116 | | *amyE::Physpank-nusG spec amp* |  |
|  | pKRH133 | | *ΩyacOsoe11 mls amp* |  |
|  | pKRH134 | | *ΩyacOsoe15/20 mls amp* |  |
|  | pKRH135 | | *ΩyacOsoe26 mls amp* |  |
|  | pKRH136 | | *Ωrae1soe7 mls amp* |  |
|  | pKRH137 | | *Ωrae1soe9 mls amp* |  |
|  | pKRH138 | | *Ωrae1soe13 mls amp* |  |
|  | pKRH139 | | *ΩydiFsoe12 mls amp* |  |
|  | pKRH140 | | *ΩydiFsoe16 mls amp* |  |
|  | pKRH141 | | *ΩydiFsoe18 mls amp* |  |
|  | pKRH142 | | *ΩydiFsoe22 mls amp* |  |
|  | pKRH143 | | *ΩydiFsoe32 mls amp* |  |
|  | pKRH144 | | *ΩnusGN21S mls amp* |  |
|  | pKRH145 | | *ΩfliYS164A mls amp* |  |
|  | pKRH165 | | *ΩfliYS164A mls amp* |  |
|  | pKRH180 | | *amyE::PyeeI-lacZ cat amp* |  |
|  | pKRH181 | | *amyE::PyeeIsoe2-lacZ cat amp* |  |
|  | pDP288 | | *PT7-6-His-SUMO-fliY amp* |  |
|  | pKB43 | | *PT7-6-His-SUMO-fliG amp* |  |
|  | pSG6 | | *Ω∆fliY mls amp* | Calvo, 2015 |
|  | pMiniMAD | | *oriBsTs mls amp* | Patrick, 2008 |
|  | pTB146 | | *PT7-6-His-SUMO amp* | Bendezύ, 2009 |
|  | pDG268 | | *amyE::lacZ cat amp* | Antoniewski, 1990 |
|  | pDG780 | | *amp kan* | Geurot-Fleury, 1995 |
|  | pDG1515 | | *amp tet* | Geurot-Fleury, 1995 |
|  | pDG1728 | | *amyE::lacZ spec amp* | Guérout-Fleury, 1996 |
|  | pAH54 | | *amp spec* | Geurot-Fleury, 1995 |
